# Supplementary material for: First Czech record of the Asian hornet (Vespa velutina) and a climatic prediction of its spread in the Czech Republic
Source: Research Square preprint supplement (doi:10.21203/rs.3.rs-3993096/v1), 2024-03-05
Supplement: Supplementary file 1 [file ee34b86f00b19c92ea9c38cd.xlsx]

## Sheet: List1
Feature Class	RM	AUC	CBI	OR (10PCT)	AIC
LQHP	0.5	0.804	0.956	0.125	74.139
H	0.5	0.798	0.958	0.123	74.171
LQH	0.5	0.798	0.957	0.124	74.174
LQ	0.5	0.761	0.855	0.162	74.838
LQHP	2024-05-01	0.789	0.936	0.125	74.328
H	2024-05-01	0.790	0.934	0.119	74.305
LQH	2024-05-01	0.787	0.930	0.119	74.325
LQ	2024-05-01	0.766	0.874	0.142	74.969
LQHP	2024-05-02	0.782	0.901	0.133	74.439
H	2024-05-02	0.783	0.915	0.134	74.414
LQH	2024-05-02	0.783	0.907	0.127	74.42
LQ	2024-05-02	0.769	0.878	0.130	75.073
